# Supplementary material for: Neuronal Cell Fate Specification by the Convergence of Different Spatiotemporal Cues on a Common Terminal Selector Cascade
Source: PLoS Biol. 2016 May 5;14(5):e1002450. doi: 10.1371/journal.pbio.1002450 (PMC4858240; doi:10.1371/journal.pbio.1002450)
Supplement: S1 Data — (XLSX) [file pbio.1002450.s001.xlsx]

## Sheet: Figure 3L
Genotype:	Control	Control	hunchback	Kruppel	Kruppel	pdm	pdm	castor	castor	grainy head	grainy head
Number of dAp cells:	α-Eya	α-Nplp1	α-Eya	α-Eya	α-Nplp1	α-Eya	α-Nplp1	α-Eya	α-Nplp1	α-Eya	α-Nplp1
	11	11	23	4	0	3	4	11	11	11	11
	11	11	24	4	0	1	3	11	11	11	11
	11	11	17	7	0	3	1	12	12	11	11
	11	11	18	3	0	6	0	12	11	11	11
	11	11	15	6	4	9	2	11	12	11	11
	10	11	15	6	2	6	5	11	10	11	11
	10	11	26	4	0	3	5	11	11	11	11
	11	11	23	9	0	7	3	11	11	11	11
	11	11	22	10	1	2	3	11	11	11	11
	8	11	28	4	2	4	5	11	11	11	11
	11	10		5	1	6	2	11	11	11	11
	11	11			0	2	3	11	11
	11	9				6	4	11	11
	11	11				4	1	11	11
	11	11					3	10	10
	10	11					3	11	10
	11	11
	10	10
	11	11
	11	12
	11	10
	11	11
	11	11
	9	11
	11	11
	10	11
	11	11
	11	11
	11	11
	11	11
	11	11
	11	11
	11	11
	11	11
	11	11
	11	11
	11	11
	11	11
	11	11
	11	9
		9
		11
		11
		11
		11
		11
		11
Mean:	10.75	10.8298	21.1	5.63636	0.833333	4.42857	2.9375	11.0625	10.9375	11	11
Standard Deviation:	0.630425	0.564113	4.58136	2.24823	1.2673	2.42462	1.59545	0.389249	0.57373	0	0

## Sheet: Figure 3N
Genotype:	Control	Control	Kruppel	Kruppel	Kr,pros>pdm	Kr,pros>pdm
Number of dAp cells:	α-Eya	α-Nplp1	α-Eya	α-Nplp1	α-Eya	α-Nplp1
	11	11	4	0	2	3
	11	11	4	0	2	1
	11	11	7	0	5	7
	11	11	3	0	2	7
	11	11	6	4	8	4
	10	11	6	2	8	5
	10	11	4	0	6	10
	11	11	9	0	4	9
	11	11	10	1	10	0
	8	11	4	2	10	1
	11	10	5	1
	11	11		0
	11	9
	11	11
	11	11
	10	11
	11	11
	10	10
	11	11
	11	12
	11	10
	11	11
	11	11
	9	11
	11	11
	10	11
	11	11
	11	11
	11	11
	11	11
	11	11
	11	11
	11	11
	11	11
	11	11
	11	11
	11	11
	11	11
	11	11
	11	9
		9
		11
		11
		11
		11
		11
		11
Mean:	10.75	10.8298	5.63636	0.833333	5.7	4.7
Standard Deviation:	0.630425	0.564113	2.24823	1.2673	3.19896	3.49762
p-value					>0,1	>0,1

## Sheet: Figure 4G
Genotype:	Control	Control	grn	grn
Number of dAp cells:	α-Eya	α-Nplp1	α-Eya	α-Nplp1
	11	11	1	0
	11	11	0	0
	11	11	0	0
	11	11	0	0
	11	11	0	0
	10	11	0	0
	10	11	0	0
	11	11	0	0
	11	11	0	0
	8	11	0	0
	11	10	0	0
	11	11	0	0
	11	9	0	0
	11	11	0	0
	11	11	0	0
	10	11	0	0
	11	11
	10	10
	11	11
	11	12
	11	10
	11	11
	11	11
	9	11
	11	11
	10	11
	11	11
	11	11
	11	11
	11	11
	11	11
	11	11
	11	11
	11	11
	11	11
	11	11
	11	11
	11	11
	11	11
	11	9
		9
		11
		11
		11
		11
		11
		11
Mean:	10.75	10.8298	0.0833333	0
Standard Deviation:	0.630425	0.564113	0.288675	0

## Sheet: Figure 5
Genotype:	Control	Control	grn	grn	pros>col	pros>col	grn,pros>col	grn,pros>col	elav>col	elav>col	grn,elav>col	grn,elav>col		Genotype:	Control	Control	col	col	elav>grn	elav>grn	col,elav>grn	col,elav>grn	pros>grn	pros>grn	col,pros>grn	col,pros>grn
Number of dAp cells:	α-Eya	α-Nplp1	α-Eya	α-Nplp1	α-Eya	α-Nplp1	α-Eya	α-Nplp1	α-Eya	α-Nplp1	α-Eya	α-Nplp1		Number of dAp cells:	α-Eya	α-Nplp1	α-Eya	α-Nplp1	α-Eya	α-Nplp1	α-Eya	α-Nplp1	α-Eya	α-Nplp1	α-Eya	α-Nplp1
	11	11	1	0	27	23	22	22	22	22	18	17			11	11	2	0	11	11	0	0	11	11	1	0
	11	11	0	0	28	25	21	21	22	22	17	15			11	11	1	0	11	11	3	0	11	11	0	0
	11	11	0	0	28	25	22	22	20	20	16	16			11	11	1	0	10	10	8	0	12	12	7	0
	11	11	0	0	29	26	23	23	20	20	14	14			11	11	1	0	11	11	7	0	11	11	8	0
	11	11	0	0	27	26	22	22	21	21	14	13			11	11	3	0	11	11	7	0	12	12	1	0
	10	11	0	0	30	26	22	22	21	21	16	16			10	11	4	0	11	11	6	0	11	11	0	0
	10	11	0	0	29	26	23	23	22	22	19	15			10	11	5	0	11	11	6	0	11	11	0	0
	11	11	0	0	30	27	23	23	22	22	20	19			11	11	2	0	11	11	6	0		11	0	0
	11	11	0	0	31	27	22	22	21						11	11	2	0	11	11	7	0		11	0	0
	8	11	0	0	33	28	22	22	21						8	11	0	0	11	11	7	0		11	1	0
	11	10	0	0	36	31	22	24							11	10	3	0	11	11	5	0		11	0	0
	11	11	0	0	35	33	22	22							11	11	2	0	11		5	0		11	0	0
	11	9		0	33	35									11	9	3	0	11		2	0			1	0
	11	11		0	25	32									11	11	3	0			2	0			1	0
	11	11		0		26									11	11	4	0			2	0			0
	10	11		0											10	11	1	0			3	0			0
	11	11													11	11	3	0				0			0
	10	10													10	10	0	0				0
	11	11													11	11	4	0
	11	12													11	12	3	0
	11	10													11	10	1	0
	11	11													11	11	0
	11	11													11	11
	9	11													9	11
	11	11													11	11
	10	11													10	11
	11	11													11	11
	11	11													11	11
	11	11													11	11
	11	11													11	11
	11	11													11	11
	11	11													11	11
	11	11													11	11
	11	11													11	11
	11	11													11	11
	11	11													11	11
	11	11													11	11
	11	11													11	11
	11	11													11	11
	11	9													11	9
		9														9
		11														11
		11														11
		11														11
		11														11
		11														11
		11														11
Mean:	10.75	10.8298	0.0833333	0	30.0714	27.7333	22.1667	22.3333	21.2	21.25	16.75	15.625		Mean:	10.75	10.8298	2.3125	0	10.9231	10.9091	4.75	0	11.2857	11.1667	1.17647	0
Standard Deviation:	0.630425	0.564113	0.288675	0	3.1977	3.41147	0.57735	0.778499	0.788811	0.886405	2.18763	1.84681		Standard Deviation:	0.630425	0.564113	1.35247	0	0.333333	0.301511	2.40832	0	0.48795	0.440959	2.4299	0
p-value:					1.2539e-08	1.4989e-05	8.66431e-47			1.84791e-05		1.92987e-06		p-value:							0.000219101				>0,1

## Sheet: Figure 6E
Genotype:	Control	Control	Kruppel	Kruppel	Kr,pros>grn	Kr,pros>grn		Genotype:	Control	Control	pdm	pdm	pdm,pro>grn	pdm,pro>grn
Number of dAp cells:	α-Eya	α-Nplp1	α-Eya	α-Nplp1	α-Eya	α-Nplp1		Number of dAp cells:	α-Eya	α-Nplp1	α-Eya	α-Nplp1	α-Eya	α-Nplp1
	11	11	4	0	5	5			11	11	3	4	9
	11	11	4	0	6	5			11	11	1	3	8	8
	11	11	7	0	5	5			11	11	3	1	9	8
	11	11	3	0	7	4			11	11	6	0	7	8
	11	11	6	4	8	5			11	11	9	2	9	7
	10	11	6	2	4	4			10	11	6	5	8	8
	10	11	4	0	5	5			10	11	3	5	8	7
	11	11	9	0	6	6			11	11	7	3	6	8
	11	11	10	1	6	5			11	11	2	3	8	8
	8	11	4	2					8	11	4	5	8	7
	11	10	5	1					11	10	6	2
	11	11		0					11	11	2	3
	11	9							11	9	6	4
	11	11							11	11	4	1
	11	11							11	11		3
	10	11							10	11		3
	11	11							11	11
	10	10							10	10
	11	11							11	11
	11	12							11	12
	11	10							11	10
	11	11							11	11
	11	11							11	11
	9	11							9	11
	11	11							11	11
	10	11							10	11
	11	11							11	11
	11	11							11	11
	11	11							11	11
	11	11							11	11
	11	11							11	11
	11	11							11	11
	11	11							11	11
	11	11							11	11
	11	11							11	11
	11	11							11	11
	11	11							11	11
	11	11							11	11
	11	11							11	11
	11	9							11	9
		9								9
		11								11
		11								11
		11								11
		11								11
		11								11
		11								11
Mean:	10.75	10.8298	5.63636	0.833333	5.83333	4.66667		Mean:	10.75	10.8298	4.42857	2.9375	8.33333	7.66667
Standard Deviation:	0.630425	0.564113	2.24823	1.2673	1.47196	0.516398		Standard Deviation:	0.630425	0.564113	2.42462	1.59545	0.816497	0.516398
p-value					0.850425	2.81574e-06		p-value					0.000496057	5.11084e-08

## Sheet: Figure 6F
Genotype:	Control	Control	Kruppel	Kruppel	Kr,pros>col	Kr,pros>col		Genotype:	Control	Control	pdm	pdm	pdm,pro>col	pdm,pro>col
Number of dAp cells:	α-Eya	α-Nplp1	α-Eya	α-Nplp1	α-Eya	α-Nplp1		Number of dAp cells:	α-Eya	α-Nplp1	α-Eya	α-Nplp1	α-Eya	α-Nplp1
	11	11	4	0	36	34			11	11	3	4	41	39
	11	11	4	0	30	30			11	11	1	3	41	39
	11	11	7	0	38	37			11	11	3	1	49	47
	11	11	3	0	28	28			11	11	6	0	44	44
	11	11	6	4	34	34			11	11	9	2	45	43
	10	11	6	2	37	33			10	11	6	5	47	46
	10	11	4	0	30	30			10	11	3	5	44	44
	11	11	9	0	35	32			11	11	7	3	42	47
	11	11	10	1	34	32			11	11	2	3
	8	11	4	2	32	25			8	11	4	5
	11	10	5	1					11	10	6	2
	11	11		0					11	11	2	3
	11	9							11	9	6	4
	11	11							11	11	4	1
	11	11							11	11		3
	10	11							10	11		3
	11	11							11	11
	10	10							10	10
	11	11							11	11
	11	12							11	12
	11	10							11	10
	11	11							11	11
	11	11							11	11
	9	11							9	11
	11	11							11	11
	10	11							10	11
	11	11							11	11
	11	11							11	11
	11	11							11	11
	11	11							11	11
	11	11							11	11
	11	11							11	11
	11	11							11	11
	11	11							11	11
	11	11							11	11
	11	11							11	11
	11	11							11	11
	11	11							11	11
	11	11							11	11
	11	9							11	9
		9								9
		11								11
		11								11
		11								11
		11								11
		11								11
		11								11
Mean:	10.75	10.8298	5.63636	0.833333	33.4	31.5		Mean:	10.75	10.8298	4.42857	2.9375	44.125	43.625
Standard Deviation:	0.630425	0.564113	2.24823	1.2673	3.30656	3.40751		Standard Deviation:	0.630425	0.564113	2.42462	1.59545	2.85044	3.20435

## Sheet: Suppl Figure 5D 
Genotype:	Control	Control	elav>grn	elav>grn	pros>grn	pros>grn
Number of dAp cells:	α-Eya	α-Nplp1	α-Eya	α-Nplp1	α-Eya	α-Nplp1
	11	11	11	11	11	11
	11	11	11	11	11	11
	11	11	10	10	12	12
	11	11	11	11	11	11
	11	11	11	11	12	12
	10	11	11	11	11	11
	10	11	11	11	11	11
	11	11	11	11		11
	11	11	11	11		11
	8	11	11	11		11
	11	10	11	11		11
	11	11	11			11
	11	9	11
	11	11
	11	11
	10	11
	11	11
	10	10
	11	11
	11	12
	11	10
	11	11
	11	11
	9	11
	11	11
	10	11
	11	11
	11	11
	11	11
	11	11
	11	11
	11	11
	11	11
	11	11
	11	11
	11	11
	11	11
	11	11
	11	11
	11	9
		9
		11
		11
		11
		11
		11
		11
Mean:	10.75	10.8298	10.9231	10.9091	11.2857	11.1667
Standard Deviation:	0.630425	0.564113	0.333333	0.301511	0.48795	0.440959
